# Supplementary material
Source: ML conference proceedings conference paper supplement (https://openreview.net/forum?id=aW9BqtRQkh)
Supplement: supplementary_material [file attachment]

# 456 Appendices

## 457 A Limitations and Societal Impacts

458 **Limitations.** Our framework utilizes large language models such as GPT-3.5 and thus inherits the  
 459 issues of those models such as hallucination and biased content. Moreover, the GPT access charges  
 460 fees. Our compatibility function  $c$  is a Transformer-based neural network which is known to be  
 461 data-hungry. Although it worked well in our experiments, it might still suffer compared to non-neural  
 462 models if starved of data. Additionally, our method requires a pretrained event model to propose  
 463 predictions so its overall performance is conditioned on this event model; if it is misspecified or  
 464 poorly trained, our framework may not work well.

465 **Societal Impacts.** Our paper develops a novel method to integrate large language models into  
 466 temporal modeling. By describing the model and releasing code, we hope to facilitate the modeling  
 467 of continuous-time sequential data in many domains. However, like many other machine learning  
 468 models, our method may be applied to unethical ends. For example, its abilities of better fitting data  
 469 and making more accurate predictions could potentially be used for unwanted tracking of individual  
 470 behavior, e.g. for surveillance.

## 471 B Method Details

### 472 B.1 ANHP on Amazon Data

473 On Amazon data, the ANHP model we used is directly from Yang et al. (2022).

### 474 B.2 Multi-relational ANHP on GDELT Data

475 On GDELT data, we apply a multi-relational variant of ANHP to model the event sequences that  
 476 contain evolving knowledge about entity interactions.

477 **Continuous-time Transformer.** For any multi-relational event  $e@t$  where  $e := (u, v, r)$  denotes  
 478 a tuple of the subject, object and predicate, we first compute an initial **embedding**  $\llbracket e \rrbracket(t) =$   
 479  $\llbracket [e^u] \rrbracket \cdot \llbracket [e^r] \rrbracket \cdot \llbracket [e^v] \rrbracket(t)$ , then attend it to its **history**  $\mathcal{H}(e@t)$ , with the continuous-time transformer  
 480 structure (Yang et al., 2022), to compute the relational score. More precisely,  $\llbracket e \rrbracket(t)$  is the concatena-  
 481 tion of layer-wise embeddings  $\llbracket e \rrbracket^{(0)}(t), \llbracket e \rrbracket^{(1)}(t), \dots, \llbracket e \rrbracket^{(L)}(t)$ . For  $\ell > 0$ , the layer- $\ell$  embedding  
 482 of  $e@t$  is computed as

$$\llbracket e \rrbracket^{(\ell)}(t) \stackrel{\text{def}}{=} \underbrace{\llbracket e \rrbracket^{(\ell-1)}(t)}_{\text{residual connection}} + \tanh \left( \sum_{f@s \in \mathcal{H}(e@t)} \frac{\mathbf{v}^{(\ell)}(f@s) \alpha^{(\ell)}(f@s, e@t)}{1 + \sum_{f@s \in \mathcal{H}(e@t)} \alpha^{(\ell)}(f@s, e@t)} \right) \quad (6)$$

483 where the unnormalized attention weight on each relevant event  $f@s \in \mathcal{H}(e@t)$  is

$$\alpha^{(\ell)}(f@s, e@t) \stackrel{\text{def}}{=} \exp \left( \frac{1}{\sqrt{D}} \mathbf{k}^{(\ell)}(f@s)^\top \mathbf{q}^{(\ell)}(e@t) \right) \in \mathbb{R} \quad (7)$$

484 In layer  $\ell$ ,  $\mathbf{v}^{(\ell)}$ ,  $\mathbf{k}^{(\ell)}$ , and  $\mathbf{q}^{(\ell)}$  are known as the **value**, **key**, and **query** vectors and are extracted from  
 485 the layer- $(\ell-1)$  event embeddings using learned layer-specific matrices  $\mathbf{V}^{(\ell)}, \mathbf{K}^{(\ell)}, \mathbf{Q}^{(\ell)}$ .

$$\mathbf{v}^{(\ell)}(e@t) \stackrel{\text{def}}{=} \mathbf{V}^{(\ell)} \begin{bmatrix} 1; \llbracket t \rrbracket; \llbracket e \rrbracket^{(\ell-1)}(t) \end{bmatrix} \quad (8a)$$

$$\mathbf{k}^{(\ell)}(e@t) \stackrel{\text{def}}{=} \mathbf{K}^{(\ell)} \begin{bmatrix} 1; \llbracket t \rrbracket; \llbracket e \rrbracket^{(\ell-1)}(t) \end{bmatrix} \quad (8b)$$

$$\mathbf{q}^{(\ell)}(e@t) \stackrel{\text{def}}{=} \mathbf{Q}^{(\ell)} \begin{bmatrix} 1; \llbracket t \rrbracket; \llbracket e \rrbracket^{(\ell-1)}(t) \end{bmatrix} \quad (8c)$$

486 As the base case,  $\llbracket e \rrbracket^{(0)}(t) \stackrel{\text{def}}{=} \llbracket [e^u] \rrbracket \cdot \llbracket [e^r] \rrbracket \cdot \llbracket [e^v] \rrbracket(t)$  is a **learned embedding of the multi-relational**  
 487 **event**  $e$ .  $\llbracket t \rrbracket$  denotes an embedding of the time  $t$ . See Section 2 in (Yang et al., 2022) for more details.

488 **Training.** Given a collection of events recorded in a temporal window  $[0, T)$ , let  $x_{[0,t]}$  be the event  
 489 sequence at time interval  $[0, t)$ , we learn the model by minimizing the negative log-likelihood

$$\mathcal{L} = - \sum_{i=1}^I \log \lambda_{r_i}^{u_i, v_i}(t_i \mid x_{[0, t_i]}) + \sum_{r=1}^{n_r} \sum_{u=1}^{n_e} \sum_{v=1}^{n_e} \int_{t=0}^T \lambda_r^{u, v}(t \mid x_{[0, t]}) dt \quad (9)$$

| DATASET | # OF     | # OF       | # OF EVENT TOKENS |      |       |
|---------|----------|------------|-------------------|------|-------|
|         | ENTITIES | PREDICATES | TRAIN             | DEV  | TEST  |
| GDELT   | 2279     | 20         | 83000             | 9000 | 15000 |
| AMAZON  | 1        | 24         | 50000             | 7000 | 13000 |

Table 1: Statistics of dataset.

The first term maximizes the probability of specific type of event between two entities; the second term penalizes non-presence of all possible types of events between all possible entity pairs in a given observation window. The overall training procedure is adopted from (Trivedi et al., 2017) where the Backpropagation Through Time (BPTT) training is conducted over a global sequence. A simple variant of Monte Carlo trick to compute the survival term of log-likelihood equation equation (9). See Appendix H in (Trivedi et al., 2017).

## C Experimental Details

### C.1 Dataset Details

**GDELT** (Global Database of Events, Language, and Tone) (Leetaru & Schrodt, 2013). The GDELT Project monitors events all over the world, with live datasets updated every 15 minutes. We only focused on the political events that happened in G20 countries from 2022-01-01 to 2022-07-31, ending up with a corpus of 109000 time-stamped event tokens. The event type  $k$  of each token has a structured name of the format “predicate(subject, object)”. Each “predicate” is one of the twenty CAMEO codes such as “CONSULT” and “INVESTIGATE” (see Appendix C.4 for a full list), and each “subject” or “object” is one of the 2279 political entities such as “JOE BIDEN” and “RUSSIA”. Each event token has a news headline that concisely describes the event. We split the dataset into disjoint train, dev, and test sets based on their dates: the 83000 events that happened before 2022-07-05 are training data; the 15000 events after 2022-07-15 are test data; the 9000 events between these dates are development data.

**Amazon** (Jianmo Ni, 2019). This dataset contains time-stamped user review behaviors on Amazon shopping pages from January 4, 2014 to October 02, 2016. Each user has a sequence of produce review events with each event containing the timestamp, the category of the reviewed product and a text of reviews, with each category corresponding to an event type. The categories of all items are first ranked by frequencies and the top 23 are kept while the rests are merged into one category, with each category corresponding to an event type. We work on a subset of 2500 most active users with average sequence length 32 and end up with  $K = 24$  event types. We split the dataset into disjoint train, dev and test set based on time line: events before August 1, 2015 and after February 1, 2016 are categorized into train and test set while the events in between the two dates are grouped into dev set. The total number of event tokens for train, dev and test are 50000, 7000, 13000, respectively.

Table 1 shows statistics about each dataset mentioned above.

### C.2 Evaluation Metric Details

Here we give the precise definitions of MAP and MAR.

MAP is computed as follows. We first initialize  $N = C = 0$ . Then, for each partial heldout event (i.e., only  $t$  given in Amazon Review,  $t$  and some attributes given in GDELT), the model gives its top  $M$  predictions on the attribute of interest (e.g., type  $k$  on Amazon Review and “object” on GDELT). There might be multiple ground-truth attributes for a heldout event since multiple events may be recorded at the same time (due to time quantization and recording errors). If any of the ground-truth is in the top  $M$  list, we update  $N$  and  $C$ : first, we have  $N += J$  where  $J \leq M$  is the number of the ground-truth attributes that are covered in the top  $M$  list; then, for  $j^{\text{th}}$  covered ground-truth, we let  $C += j/R$  where  $R$  is its rank in the top  $M$  list. In the end, MAP is defined as  $C/N$ . Each  $i/R$  is a pseudo-count for this event: it is in  $(0, 1]$  since the rank  $R$  of the  $j^{\text{th}}$  correct prediction will be surely  $\geq j$ ; if it ranks at the top,  $i/R$  is close to 1 and it is counted as “predicted correctly”; if it ranks at the bottom,  $i/R$  is close to 0, meaning that it is almost missed by the top  $M$  proposals.

MAR is defined as follows. We first initialize  $N = C = 0$ . For each partial heldout event, the model gives its top  $M$  proposals on the attribute of interest; for the  $j^{\text{th}}$  correct prediction in the list, we let

535  $C += j/R$  where  $R$  is its rank in the top  $M$  list; in the end, MAR is defined as  $C/N$  where  $N$  is the  
536 number of actual events.

537 The mean rank in section 5.2 is not affected by the fact that there might be multiple ground-truth  
538 attributes. That is because the contribution of  $j^{\text{th}}$  ground-truth (among the multiple) to the final  
539 number is only dependent on its rank in the list but not its  $j$  index.

### 540 C.3 Implementation Details

541 All models are implemented using the PyTorch framework (Paszke et al., 2017).

542 For the implementation of NHP, AttNHP and energy functions, we used the code from the public  
543 Github repository at [https://github.com/ant-research/hypro\\_tpp](https://github.com/ant-research/hypro_tpp) (Xue et al., 2022) with  
544 Apache License 2.0.

545 For the implementation of Know-Evolve, we used the code from the public Github repository at  
546 <https://github.com/rstriv/Know-Evolve> (Trivedi et al., 2017) without any license.

547 For the implementation of DyRep, we used the code from the public Github repository at <https://github.com/uoguelph-mlrg/LDG> (Trivedi et al., 2019) without any license.

549 For the implementation of MAR@M and MAP@M, we used the code from the public Github repository at <https://github.com/statisticianinstilettos/recmetrics> without any license.

551 For the implementation of Levenshtein distance, we used the code from the public Github repository at <https://github.com/maxbachmann/Levenshtein.git> with General Public License 2.0.

553 To compute the dense representations of text descriptions of events, we use the code from the public  
554 Github repository at <https://github.com/UKPLab/sentence-transformers> with Apache  
555 License 2.0.

### 556 C.4 Event Prompting

557 We show one example of the prompt structures used for GDELT dataset as below. The effect event  
558 consists of an event type, an event time, a subject name and an object name while the causal events  
559 consists of an event headline additionally.

```
560 I want you to do the reasoning over social events. I given you an effect event
561 and you give me four or five causal events. An effect event is an event that
562 happens. A causal event is an event that is believed to be one of the causes that
563 trigger an effect event to happen. Each event consists of an event headline, an
564 event type, an event time, subject name and object name of describing the event.
565
566
567 The event types of the effect and cause events are restricted to 20 types, with
568 names (in capital) and the descriptions below.
569 1. MAKE STATEMENT: decline comment, make comments.
570 2. APPEAL: appeal for material, economic, military, humanitarian aid or
571 cooperation.
572 3. EXPRESS INTENT TO COOPERATE: Express intent to engage in material, diplomatic,
573 military aid.
574 4. CONSULT: make a visit, host a visit.
575 5. ENGAGE IN DIPLOMATIC COOPERATION: praise or endorse, defend verbally.
576 6. ENGAGE IN MATERIAL COOPERATION: cooperate economically, militarily, judicially.
577
578 7. PROVIDE AID: provide economic, military, humanitarian aid.
579 8. YIELD: ease admin or political sanctions or military blockade, return and
580 release.
581 9. INVESTIGATE: investigate crime, corruption, human rights abuses, military
582 actions.
583 10. DEMAND: demand any type of cooperation, aid, reforms, rights, easing of
584 sanctions.
585 11. DISAPPROVE: criticize or denounce, accuse of crime, human rights abuses,
586 complain officially and make lawsuit against.
587 12. REJECT: reject material, economic, military, judicial operations, requests or
588 plans.
589 13. THREATEN: threaten to reduce aid, to boycott, to reduce or break relations,
590 to impose sanctions.
```

```

591 14. PROTEST: civilian demonstrations.
592 15. EXHIBIT MILITARY POSTURE.
593 16. REDUCE RELATIONS: reduce or break any relations.
594 17. COERCE: seize or damage properties, impose administrative sanctions or
595 restrictions.
596 18. ASSAULT: use of unconventional forms of violence.
597 19. FIGHT: uses of conventional force.
598 20. ENGAGE IN UNCONVENTIONAL MASS VIOLENCE.
599
600 Now I give you 10 examples of event reasoning. In each example, the first event
601 is the effect event, the next three to five events are cause events that happen
602 earlier.
603
604
605 ## Example 1
606
607 effect event
608 event type: Use unconventional violence
609 event time: 2022-03-08
610 subject name: JOE BIDEN
611 object name: RUSSIA
612
613 -----
614 reasoning:
615 cause event 1
616 event headline: Joe Biden Welcomes Visa & Mastercard's Decision To Suspend
617 Operations In Russia
618 event type: ENGAGE IN DIPLOMATIC COOPERATION
619 event time: 2022-03-06
620 subject name: RUSSIA
621 object name: JOE BIDEN
622
623 cause event 2
624 event headline: Putin says Ukraine's future is in doubt as cease-fires collapse
625 event type: Threaten
626 event time: 2022-03-06
627 subject name: RUSSIA
628 object name: UKRAINE
629
630 cause event 3
631 event headline: Zelensky Urges US Lawmakers to Ban Russian Oil, Provide Fighter
632 Jets
633 event type: Make statement
634 event time: 2022-03-05
635 subject name: COLONEL
636 object name: RUSSIA
637
638 cause event 4
639 event headline: Marshall, Moran seek ban on Russian oil imports, urge expansion
640 of domestic production
641 event type: Use unconventional violence
642 event time: 2022-03-05
643 subject name: SENATOR
644 object name: RUSSIA

```

Listing 3: Prompt Structures used for GDELT dataset.

646 The following is one exemplar of the prompt used for Amazon dataset. The effect event consists of  
647 product category and event time while the causal events consists of a review text.

```

648 I want you to do the reasoning over the events that are extracted from online-
649 shopping review data. I given you an effect event and you give me two to four
650 cause events. An effect event is an event that happens. A causal event is an
651 event that is believed to be one of the causes that trigger an effect event to
652 happen. Each event corresponds to an review submitted by the customer, which
653

```

consists of an product category(event type), a product title, an event time, summary text and review text from the user that describes the feedback of the shopping event.

The product categories are restricted to the following set:

1. Women Shoes,
2. Men Shoes,
3. Men Clothing,
4. Women Clothing,
5. Novelty & More,
6. Men Uniforms, Work & Safety,
7. Women Jewelry,
8. Costumes & Accessories,
9. Men Accessories,
10. Luggage & Travel Gear,
11. Men Watches,
12. Women Accessories,
13. Children Shoes,
14. Children Clothing
15. Shoe, Jewelry & Watch Accessories,
16. Women Watches,
17. Women Uniforms, Work & Safety,
18. Men Surf, Skate & Street,
19. Women Handbags & Wallets
20. Men Jewelry
21. Children Accessories
22. Women Maternity
23. Women General
24. Others

# Example 1

effect event  
product category: Luggage & Travel Gear  
event time: 2013-10-19

-----

reasoning:  
cause event 1  
product category: Novelty & More  
product title: Sports Katz Peace Out Socks  
event time: 2013-09-24  
summary text: Peace Out Socks  
review text: We ordered these for soccer for my daughter and they worked out well.  
They are very cute and have held up. They are a quite thick, which is why I only gave them 4 stars. They will work better for fall season; I would not recommend them for summer soccer, if soccer is your intended use.

cause event 2  
product category: Luggage & Travel Gear  
product title: Wildkin Pink Retro Kickstart Messenger Bag  
event time: 2013-09-09  
summary text: Wildkin Kickstart Messenger Bag  
review text: My daughter, going to 4th grade, wanted a messenger type bag this year for school. I searched and searched on Amazon for the perfect bag, but all of the adult bags seemed huge (like they would definately look funny with her carrying them). Thank goodness I found this bag. It is the perfect size for her, and her favorite color!.

cause event 3  
product category: Children Clothing  
product title: Levi's Girls' 715 Thick Stitch Bootcut Jean  
event time: 2013-09-01  
summary text: Thick Stitch Bootcut Jeans

```

718 review text: I love Levis and this style is sooo cute! My daughter even likes
719 them! The price was amazing in these, as we found similar Levis at Dillard's for
720 36. The waist of these Levi in particular run small compared to other Levis of
721 the same size. During the Levis sale on Amazon, we purchased these, the Sweetie
722 Skimmers, and the Scooter. All of the others ran almost half an inch larger in
723 the waist. I worry the larger size would be huge on her, but I think I will try
724 the larger size, as they must be comfortable on her or she will not wear them.
725
726 cause event 4
727 product category: Children Shoes
728 product title: New Balance KJ750 Running Running Shoe (Lttle Kid/Big Kid)
729 event time: 2013-02-02
730 summary text: Cute and durable!
731 review text: I ordered these for my 8 year old daughter. She usually destroys
732 shoes within months, but these have held up!
733

```

Listing 4: Prompt Structures used for Amazon dataset.

734 For the full set of prompts used in the paper, please see `scripts/gdelt/gdelt/gdelt_`  
735 `prompts` and `scripts/amazon/amazon/amazon_prompts` in our submitted code.

### 736 C.5 Does GPT remember Amazon Review data?

737 We have a conversation with GPT-3.5-turbo to verify that it does not remember the exact information  
738 of Amazon Review data.

```

739 input: We are using Amazon Review Data, published by Jianmo Ni, , 2018, which is
740 firstly used in the paper "Justifying recommendations using distantly-labeled
741 reviews and fined-grained aspects", EMNLP 2019.
742

```

```

743
744 The dataset includes millions of reviews (ratings, text, helpfulness votes),
745 product metadata (descriptions, category information, price, brand, and image
746 features) in the range May 1996 - Oct 2018. Do you remember any of the review
747 information if I give you a review id?
748

```

```

749 GPT-3.5 output: As an AI language model, I am not capable of remembering any
750 review information unless I have been programmed to store and retrieve specific
751 pieces of information. However, I can search for and retrieve review information
752 from the dataset if given a review ID.
753

```

```

754 input: can you recall any information with reviewer ID A28GK1G2KDXHRP on date 04
755 17, 2014.
756

```

```

757 GPT-3.5 output: I apologize, but the Amazon Review dataset does not include
758 information about the specific date when a review was posted. It only includes
759 the year and month when the review was posted. Therefore, I cannot provide you
760 with any information about reviews posted by reviewer ID A28GK1G2KDXHRP on April
761 17, 2014.
762

```

```

763 input: Reviewer A0148968UM59JS3Y8D1M bought Hanes Men's Classic Crew on 01 18,
764 2014, what review did he wrote?
765

```

```

766 GPT-3.5 output: I apologize, but as an AI language model, I do not have access to
767 real-time or updated information about specific Amazon reviews or purchases made
768 by individual reviewers. Additionally, the Amazon Review dataset does not
769 include information about the specific content of a specific review. It only
770 includes metadata such as the reviewer ID, product ID, and overall rating.
771 Therefore, I cannot provide you with the review written by the reviewer
772 A0148968UM59JS3Y8D1M for the Hanes Men's Classic Crew on January 18, 2014 or any
773 other date.
774

```

```

775 input: Reviewer A0148968UM59JS3Y8D1M bought Hanes Men's Classic Crew on 01 18,
776 2014, his review starts with 'they seem very well made..', can you recall the
777 complete review he wrote?
778

```

```

779 GPT-3.5 output: I apologize, but as an AI language model, I do not have access to
780 real-time or updated information about specific Amazon reviews or purchases made
781 by individual reviewers. Additionally, the Amazon Review dataset does not
782 include information about the specific content of a specific review. It only
783 includes metadata such as the reviewer ID, product ID, and overall rating.
784 Therefore, I cannot provide you with the complete review written by the reviewer
785 A0148968UM59JS3Y8D1M for the Hanes Men's Classic Crew on January 18, 2014, or any
786 other date.
787
788 input: on which date did reviewer A0148968UM59JS3Y8D1M buy Hanes Men's 7-Pack
789 ComfortSoft Briefs?
790
791 GPT-3.5 output: Sorry, as an AI language model, I do not have access to personal
792 information or purchase history of individuals.
793

```

Listing 5: Prompt examples used for testing the memory of GPT-3.5-turbo

## 794 C.6 Training and Testing Details

795 **Language Models.** We use the variants of `davinci` and `gpt-3.5-turbo` for GPT-3 and GPT-3.5  
796 models respectively and access them via the OpenAI API. To produce a stable output, we set the  
797 temperature to be 0.

798 **Training Base Models.** For each method, we used grid search on hyperparameters and chose the  
799 ones providing the best performance on the held-out dev set (see Table 2). For KE, DyRep, ANHP,  
800 the main hyperparameters to tune are the entity embedding size  $D_1$ , predicate embedding size  $D_2$   
801 , RNN hidden size  $D_3$  used in the network and the number of layers  $L$  of the attention structure  
802 (DyRep and ANHP). In practice, the optimal  $D$  for a model was usually 4, 8, 16, 32; the optimal  $L$   
803 was usually 1, 2, 3, 4. In the experiment, to train the parameters of the base model, we performed  
804 early stopping based on log-likelihood on the held-out dev set.

805 **Causal Events Retrieval.** For each event, we conduct few-shot prompt (see Appendix C.4 for  
806 detailed exemplars) to generate a set of causal events. For each generated causal event, we compute  
807 the distance of textual descriptions between itself and the event in the history and then retrieve the  
808 closest  $\alpha_{retro}$  events as the 'real causal events'.

809 • For GDELT dataset, the textual description of the event consists of event headline, event type, event  
810 time, subject name and object name. We set  $\alpha_{retro} = 2$  so that the average length of retrieved  
811 event sequence is 10.

812 • For Amazon dataset, the textual description consists of product category, product tile, event time  
813 and review text. We set  $\alpha_{retro} = 4$  so that the average length of retrieved event sequence is 10.

814 **Training Ranking Model.** The score function of the ranking model is built on ANHP with 3 MLP  
815 layers to project the hidden states into a scalar energy value. The ANHP used by the ranking model  
816 is set to have the same structure as the base model 'ANHP'. The hyperparameters are tuned within  
817 a range of values that make the score function to have a similar size of total parameters with the  
818 base ANHP model. During training, each pair of training sample contains 1 positive sample and  
819  $N$  negative samples:  $N = 5$  for the task of predicate prediction and  $N = 20$  for the task of object  
820 prediction on GDELT data,  $N = 5$  for the task of both event type and time prediction on Amazon  
821 data.

822 **Computation Cost.** All the experiments were conducted on a server with 256G RAM, a 64 logical  
823 cores CPU (Intel(R) Xeon(R) Platinum 8163 CPU @ 2.50GHz) and one NVIDIA A100 GPU for  
824 acceleration.

825 For training, our batch size is 8. For GDELT data, training the baseline KE, DyRep and ANHP  
826 approximately takes 1 hour, 1.3 hour, and 2 hours respectively (4.5, 5.8, 9 milliseconds per sequence).  
827 On Amazon data, training the baseline NHP and ANHP approximately takes 1 hour and 2 hours,  
828 respectively. On both dataset, training the ranking model takes around 30 minutes (9 milliseconds per  
829 sequence pair) respectively.

| MODEL         | DESCRIPTION              | VALUE USED |        |
|---------------|--------------------------|------------|--------|
|               |                          | GDEL       | AMAZON |
| KNOW-EVOLVE   | ENTITY EMBEDDING SIZE    | 16         | NA     |
|               | PREDICATE EMBEDDING SIZE | 4          | NA     |
|               | RNN HIDDEN SIZE          | 16         | NA     |
| DYREP         | ENTITY EMBEDDING SIZE    | 16         | NA     |
|               | PREDICATE EMBEDDING SIZE | 4          | NA     |
|               | RNN HIDDEN SIZE          | 16         | NA     |
|               | ATTENTION LAYERS NUMBER  | 1          | NA     |
| NHP           | RNN HIDDEN SIZE          | NA         | 36     |
|               | ENTITY EMBEDDING SIZE    | NA         | 16     |
|               | PREDICATE EMBEDDING SIZE | NA         | 8      |
| ANHP          | ENTITY EMBEDDING SIZE    | 16         | 32     |
|               | PREDICATE EMBEDDING SIZE | 4          | 32     |
|               | HEADS NUMBER             | 2          | 1      |
|               | ATTENTION LAYERS NUMBER  | 1          | 2      |
| RANKING MODEL | TEMPORAL EMBEDDING SIZE  | 40         | 24     |
|               | HIDDEN SIZE              | 60         | 56     |
|               | HEADS NUMBER             | 4          | 16     |
|               | ATTENTION LAYERS NUMBER  | 3          | 3      |

Table 2: Descriptions and values of hyperparameters used for models trained on the two datasets.

## 830 C.7 More Results

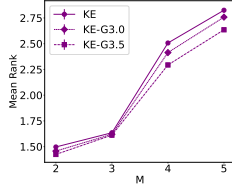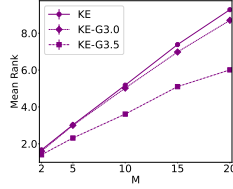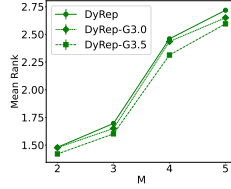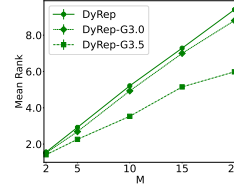

Figure 10: GPT-3.0 vs. GPT-3.5: mean rank on predicate prediction (left) and object prediction (right) on GDEL dataset. KE as the base model

Figure 11: GPT-3.0 vs. GPT-3.5: mean rank on predicate prediction (left) and object prediction (right) on GDEL dataset. DyRep as the base model.

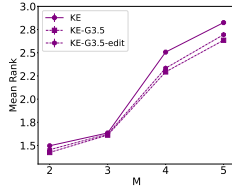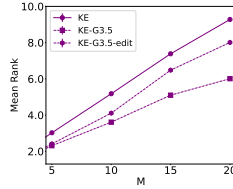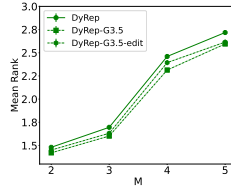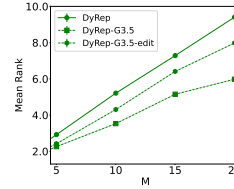

Figure 12: Bert embedding distance vs edit distance: mean rank on predicate prediction (left) and object prediction (right) on GDEL dataset. KE as the base model

Figure 13: Bert embedding distance vs edit distance: mean rank on predicate prediction (left) and object prediction (right) on GDEL dataset. DyRep as the base model.

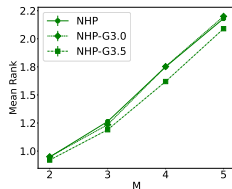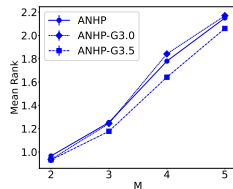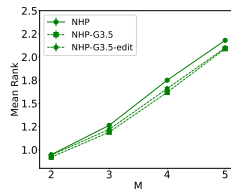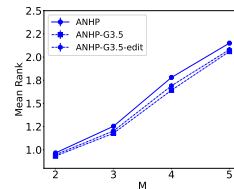

Figure 14: GPT 3.0 vs GPT 3.5: mean rank on type prediction on Amazon dataset.

Figure 15: Effect of distance measure: mean rank on type prediction on Amazon dataset.
